# Supplementary material for: Role of Inflammatory Cell Subtypes in Heart Failure
Source: Hindawi journal article supplement (doi:10.1155/2019/2164017), 2019-09-02
Supplement: f1 [file 2164017.f1.pdf]

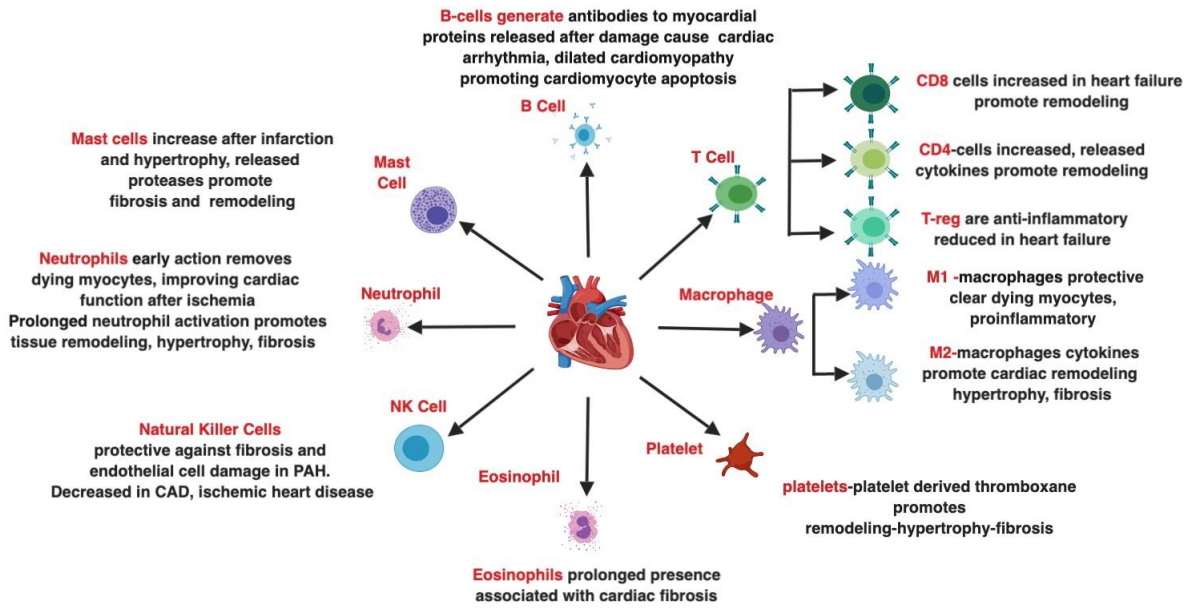

Abstract summary: Role of Inflammatory Cells in Heart Failure: Figure sum  
inflammatory cells to heart failure
